# Supplementary material for: Microcapsule-Type Self-Healing Protective Coating That Can Maintain Its Healed State upon Crack Expansion
Source: Materials (Basel). 2021 Oct 19;14(20):6198. doi: 10.3390/ma14206198 (PMC8539965; doi:10.3390/ma14206198)
Supplement: Supplementary file 1 [file materials-14-06198-s001.zip › materials-1404823-supplementary.pdf]

<Supplementary Materials>

# Microcapsule-Type Self-Healing Protective Coating That Can Maintain the Healed State upon Crack Expansion

Ji-Sun Lee, Hyun-Woo Kim, Jun-Seo Lee, Hyun-Soo An and Chan-Moon Chung \*

Department of Chemistry, Yonsei University, Wonju, Gangwon-do 26493, Korea

\*Correspondence: cmchung@yonsei.ac.kr; Tel.: +82-33-760-2266

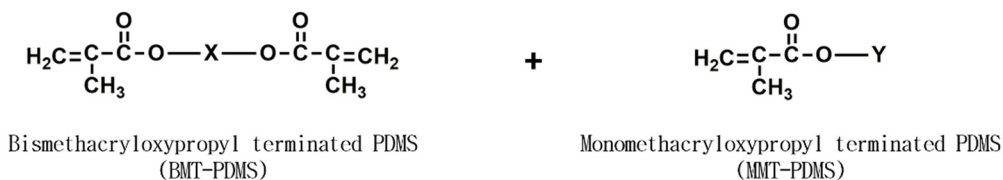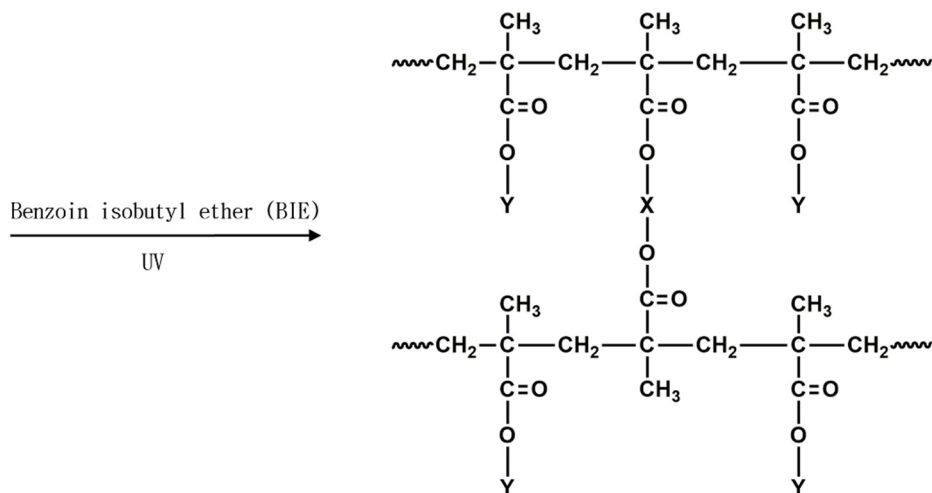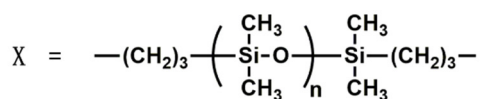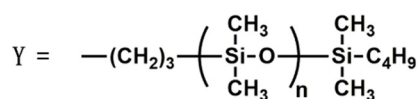

**Scheme S1.** Chemical structure and photocrosslinking of BMT-PDMS and MMT-PDMS.

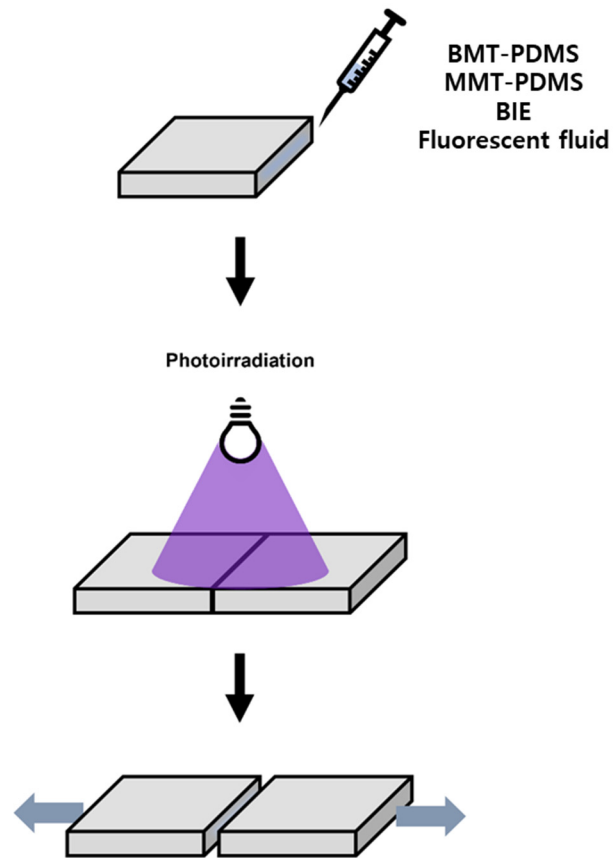

**Figure S1.** Schematic illustration of the stretchability test.

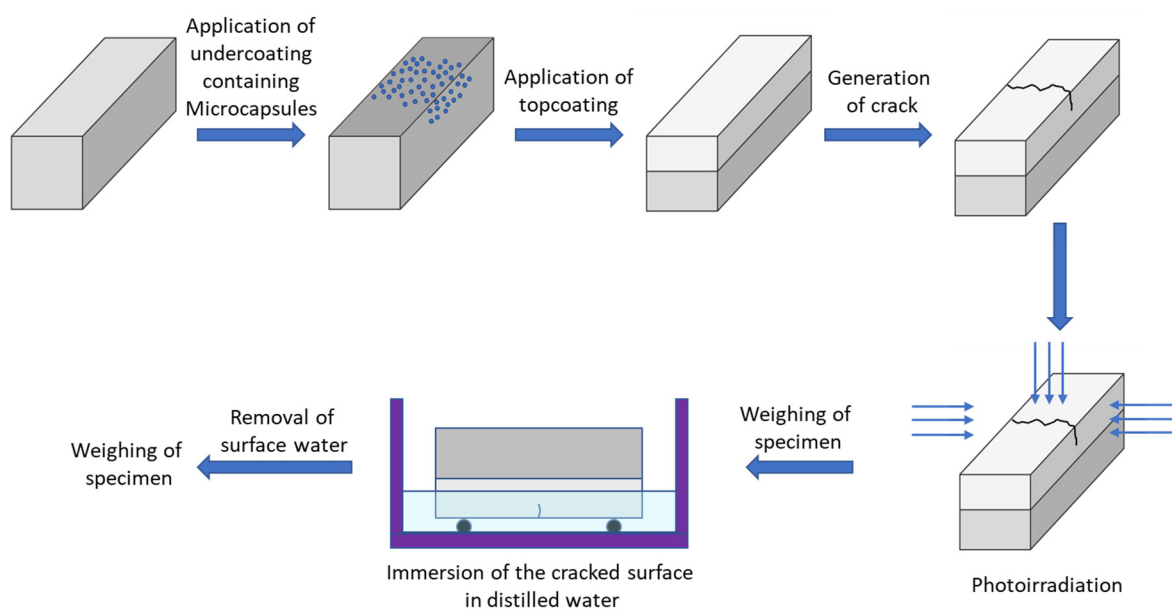

**Figure S2.** Schematic illustration of water sorptivity test.

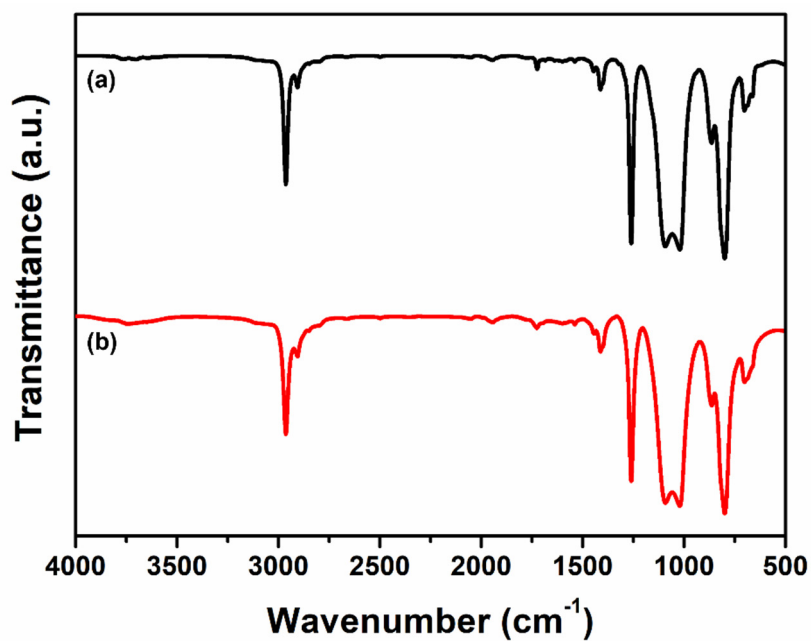

**Figure S3.** FT-IR spectra of B-M-1-1 (a) before and (b) after photoirradiation.

**Table S1.** Maximum stretched widths (MSWs) of the reaction products according to mass ratio of two methacrylates <sup>a</sup>.

|                 | (a)         | (b)         | (c)         | (d)         | (e)         | (f) | (g) |
|-----------------|-------------|-------------|-------------|-------------|-------------|-----|-----|
| <b>MSW (mm)</b> | <b>1.20</b> | <b>1.22</b> | <b>1.62</b> | <b>1.10</b> | <b>0.79</b> | -   | -   |

<sup>a</sup> Mass ratio of BMT-PDMS and MMT-PDMS: (a) 3:1; (b) 2:1; (c) 1.5:1; (d) 1:1; (e) 1:1.5; (f): 1:2; (g) 1:3.

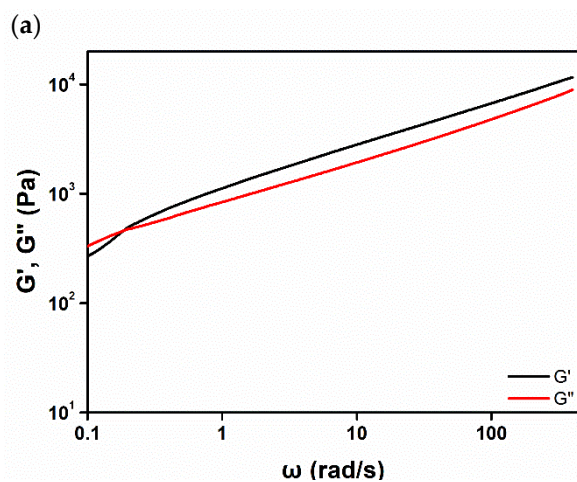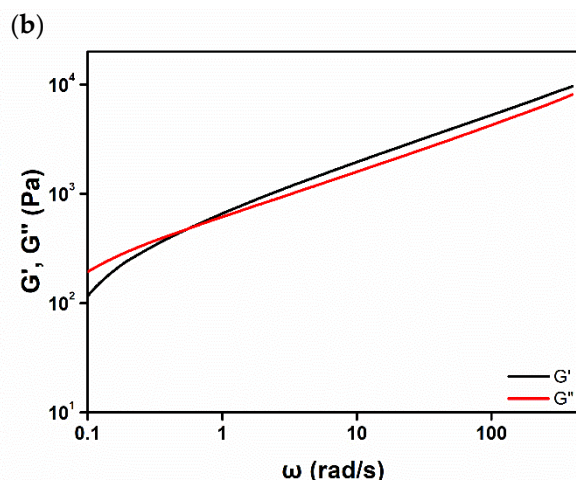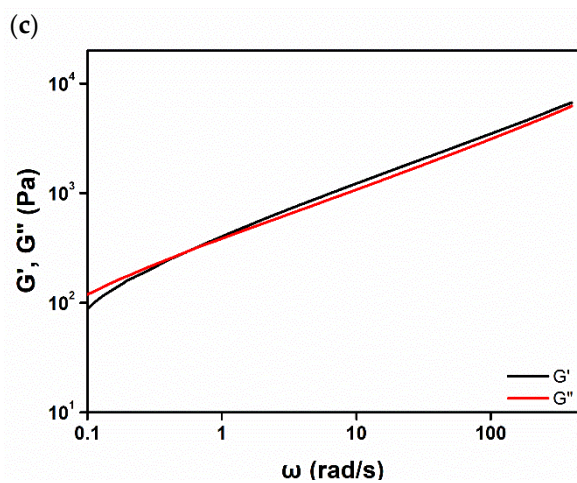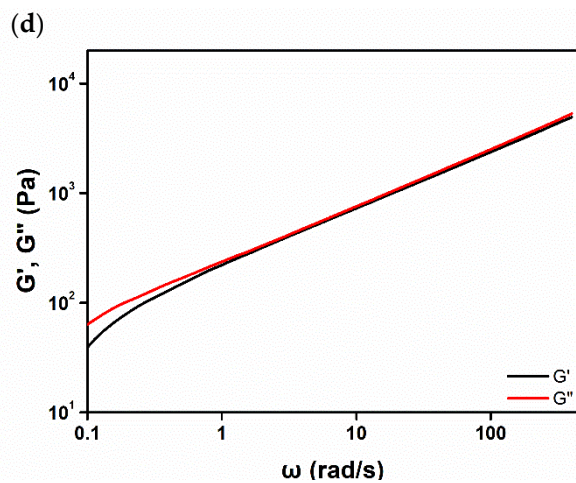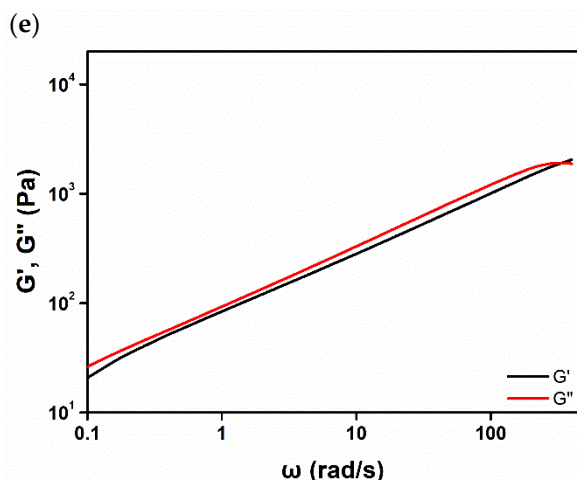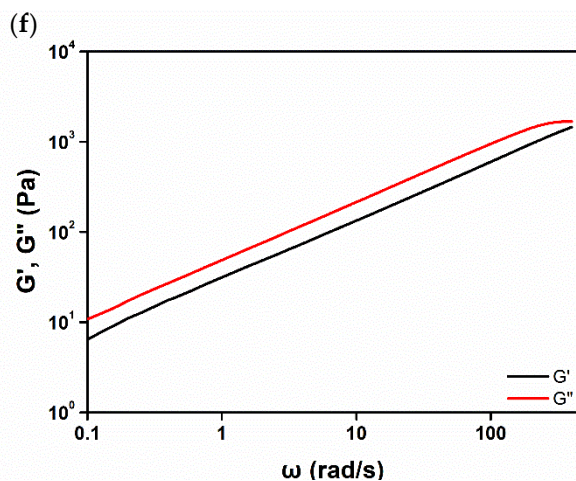

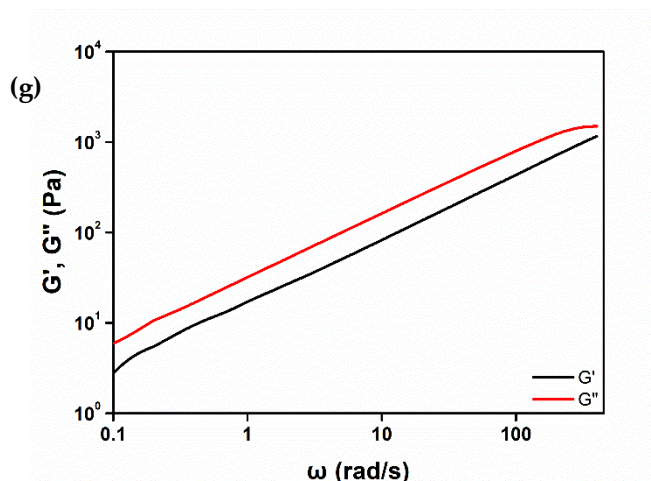

**Figure S4.** Storage modulus ( $G'$ ) and loss modulus ( $G''$ ) of the reaction products: (a) B-M-3-1; (b) B-M-2-1; (c) B-M-1.5-1; (d) B-M-1-1; (e) B-M-1-1.5; (f) B-M-1-2; (g) B-M-1-3.

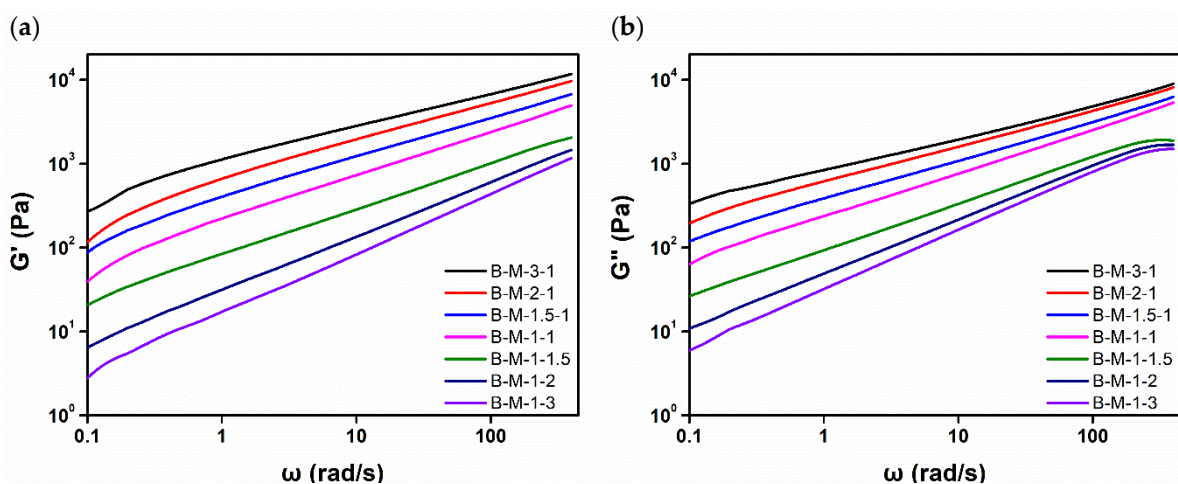

**Figure S5.** (a) Storage modulus ( $G'$ ) and (b) loss modulus ( $G''$ ) of the reaction products.

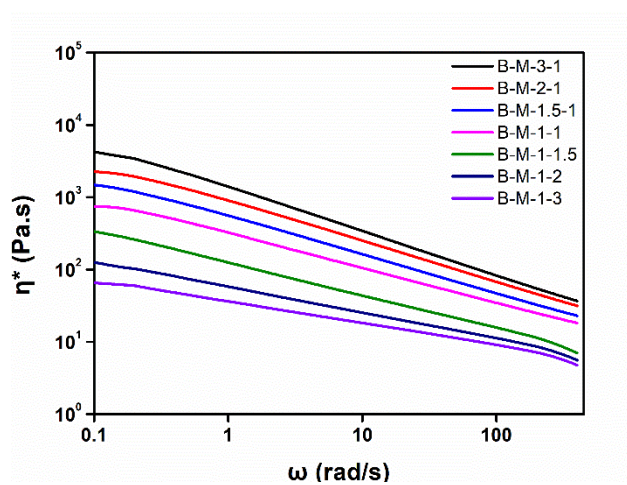

**Figure S6.** Complex viscosity ( $\eta^*$ ) curves of the reaction products.

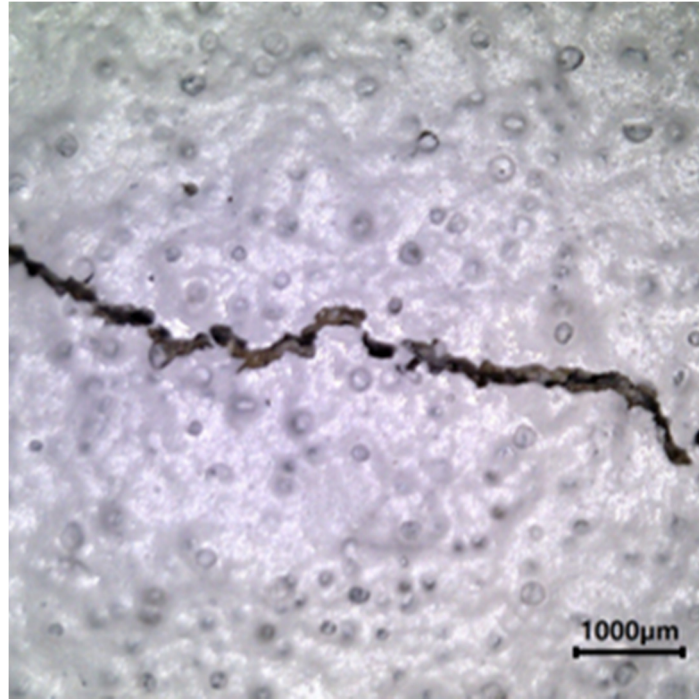

**Figure S7.** A microscopic image of a crack generated in the coated mortar specimens.
